# Supplementary material for: Sex-Dependence in the Effect of Pharmaceutical Excipients: Polyoxyethylated Solubilising Excipients Increase Oral Drug Bioavailability in Male but Not Female Rats
Source: MDPI journal article supplement (doi:10.3390/pharmaceutics11050228), 2019-05-10
Supplement: s1 [file s1]

# Supplementary Materials: Sex-Dependence in the Effect of Pharmaceutical Excipients: Polyoxyethylated Solubilising Excipients Increase Oral Drug Bioavailability in Male but not Female Rats

Yang Mai, Liu Dou, Christine M. Madla, Sudaxshina Murdan and Abdul W. Basit

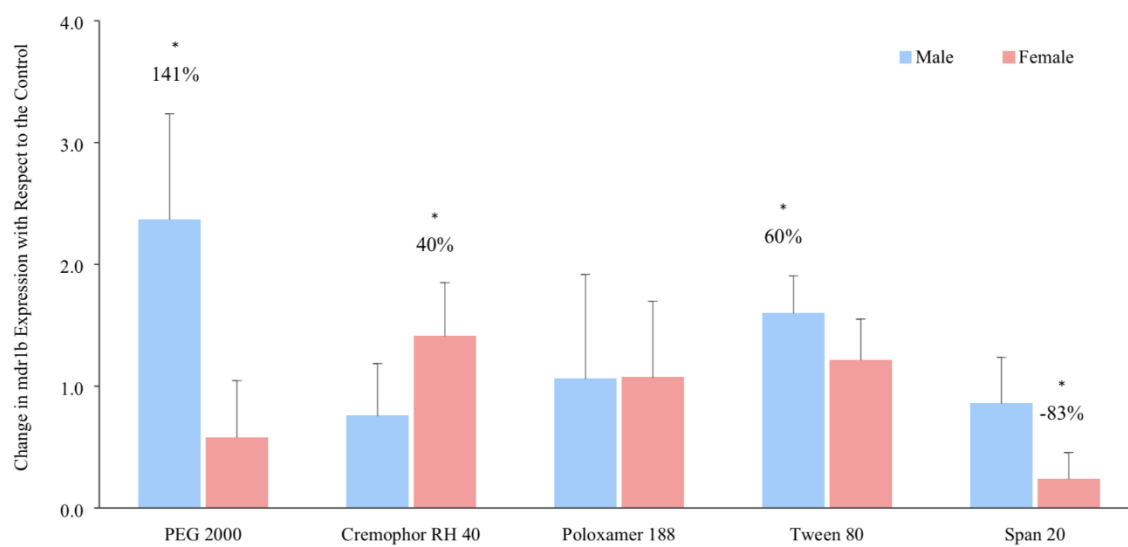

**Figure S1.** Percentage changes in *mdr1b* mRNA expression in the presence of excipients in male and female Wistar rats (mean ± SD,  $n = 6$ ).
